# Supplementary material
Source: Springer Nature journal article supplement (https://www.springermedizin.de/resource/supplementary/13058_2013_3583_MOESM17_ESM.pdf/9703864)
Supplement: MOESM17 [file 9703864]

Table 4. Targeted Q-PCR analysis of intact mammary glands after 3 or 4 weeks on HFD vs. LFD

A Growth Factor PCR Array, 3 weeks on diet HFD vs. LFD

| Symbol | Description                 | Fold change |
|--------|-----------------------------|-------------|
| Fgf18  | Fibroblast growth factor 18 | 2.0         |
| Il4    | Interleukin 4               | 2.0         |

B Growth Factor PCR Array, 4 weeks on diet HFD vs. LFD

| Symbol | Description                       | Fold change |
|--------|-----------------------------------|-------------|
| Bdnf   | Brain derived neurotrophic factor | 2.4         |
| Lefty2 | Left-right determination factor 2 | -2.5        |
| Lif    | Leukemia inhibitory factor        | 2.8         |

C Inflammation PCR Array, 3 weeks on diet HFD vs. LFD

| Symbol | Description                     | Fold change |
|--------|---------------------------------|-------------|
| Ccl24  | Chemokine (C-C motif) ligand 24 | 2.7         |
| Ccl3   | Chemokine (C-C motif) ligand 3  | 2.3         |
| Il4    | Interleukin 4                   | 2.2         |
| Il5ra  | Interleukin 5 receptor, alpha   | 3.0         |

D Inflammation PCR Array, 4 weeks on diet HFD vs. LFD

| Symbol | Description                                         | Fold change |
|--------|-----------------------------------------------------|-------------|
| RANKL  | Receptor activator of nuclear factor kappa-B ligand | 17          |

E Angiogenesis PCR Array, 3 weeks on diet HFD vs. LFD

| Symbol | Description                                    | Fold change |
|--------|------------------------------------------------|-------------|
| Hand2  | Heart and neural crest derivatives expressed 2 | 2.9         |

F Angiogenesis PCR Array, 4 weeks on diet HFD vs. LFD

| Symbol | Description        | Fold change |
|--------|--------------------|-------------|
| Fzd5   | Frizzled homolog 5 | 2.0         |

N=3 HFD mice, N=3 LFD mice  
 $p \leq 0.05$  for all genes listed
